# Supplementary material for: Assessment of human inter-individual variability of phloretin metabolites in urine after apple consumption. AppleCOR study
Source: Royal Society of Chemistry journal article supplement (doi:10.1039/d3fo02985a), 2023-01-01
Supplement: d3fo02985a1.pdf [file d3fo02985a1.pdf]

**Phloretins in apple  
fruit**

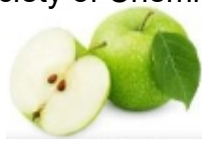

**Low-PhA**

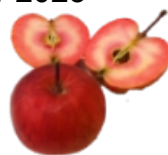

**High-PhA**

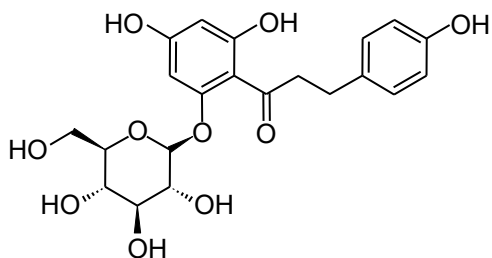

**Phloretin-2'-O-glucoside  
(phloridzin)**

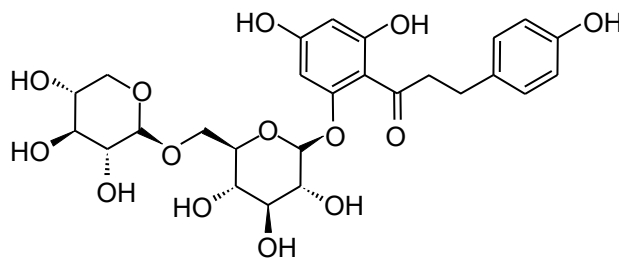

**Phloretin-2'-O-(2''-xylosyl)glucoside**

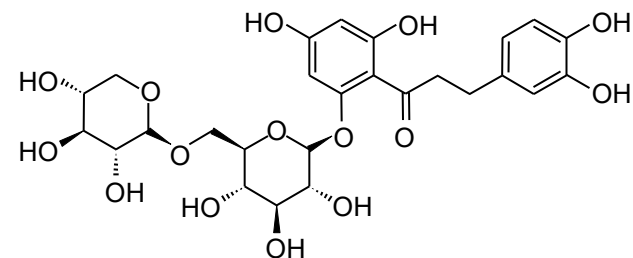

**3-Hydroxyphloretin-2'-O-(2''-xylosyl)glucoside**

**Phloretin phase II metabolites in  
human urine**

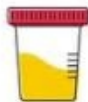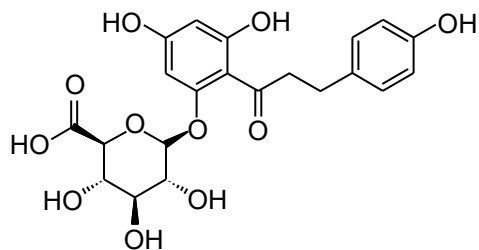

**Phloretin-2'-O-glucuronide**

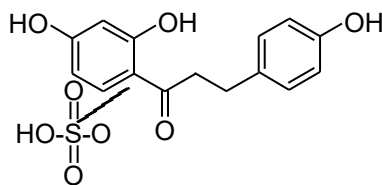

**(\*) Phloretin-2'-O-sulphate**

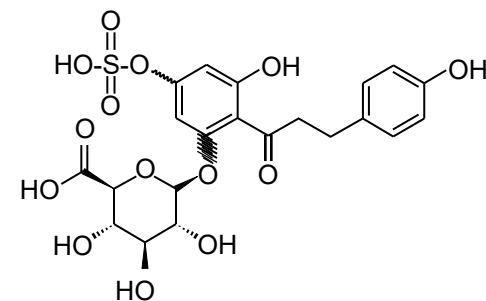

**(\*) Phloretin-O-sulphate-O-glucuronide**

**a) Low-phloretin apple snack**

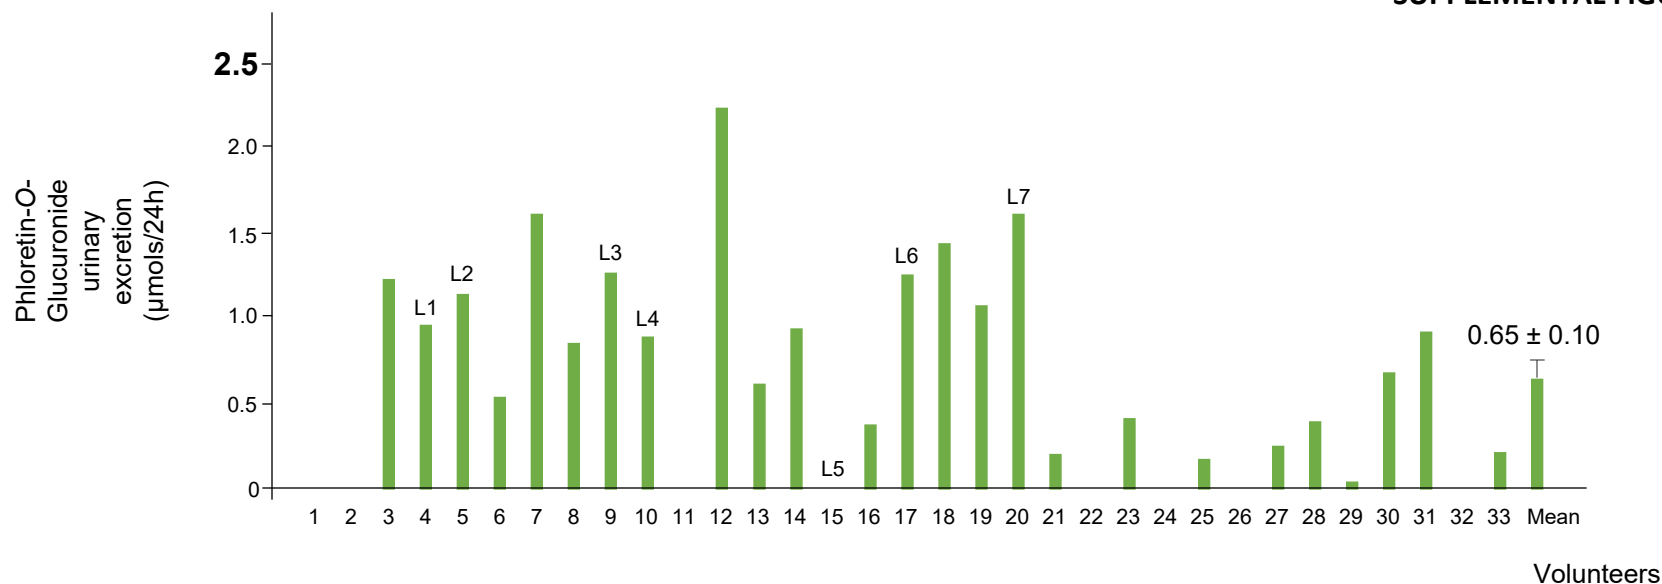

**b) High-phloretin apple snack**

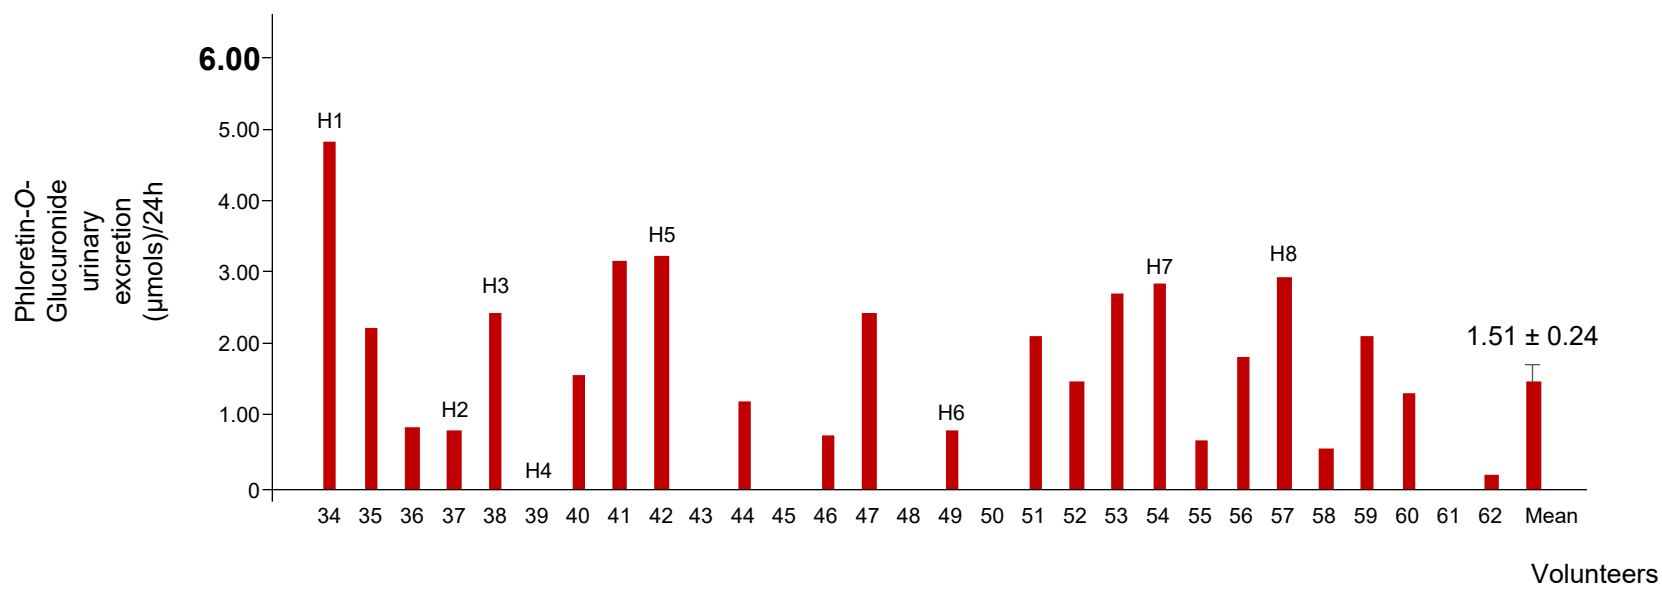

**a) Low-phloretin apple snack**

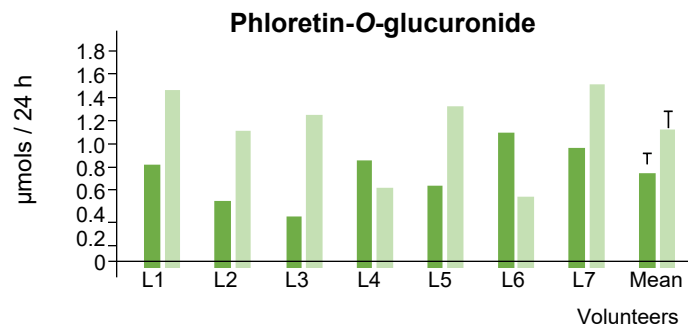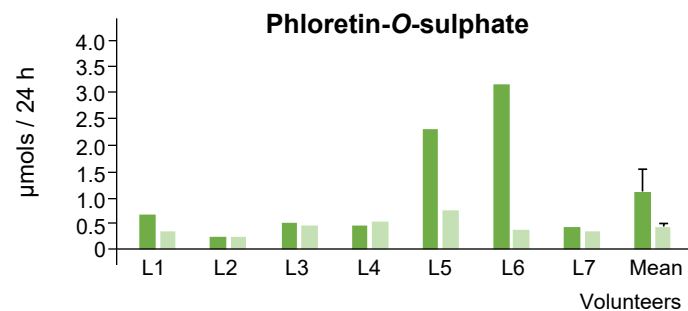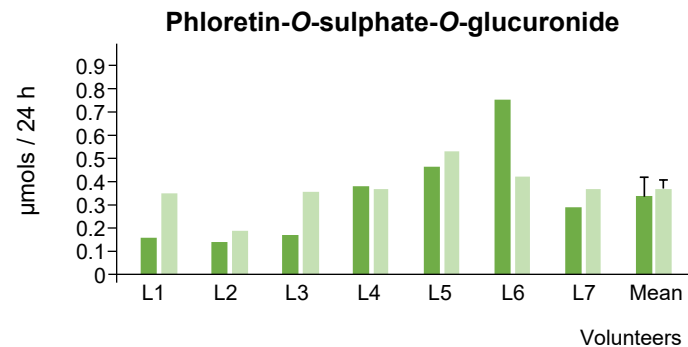

**b) High-phloretin apple snack**

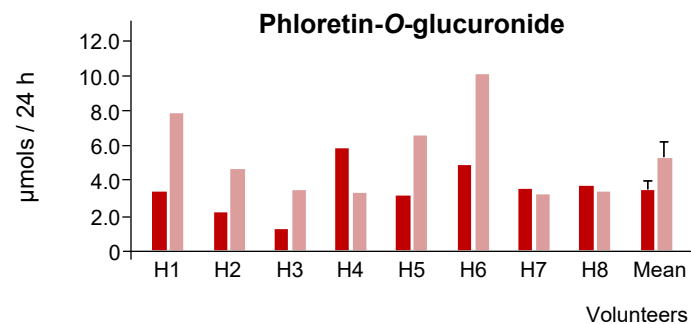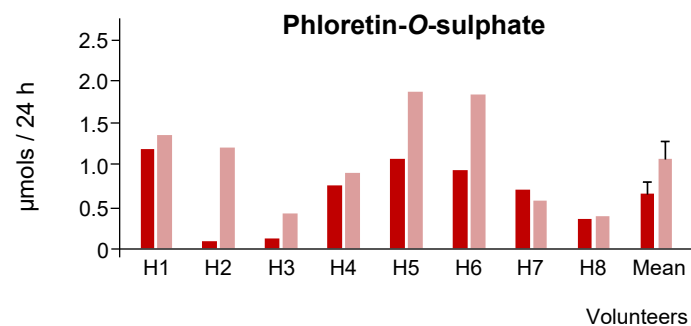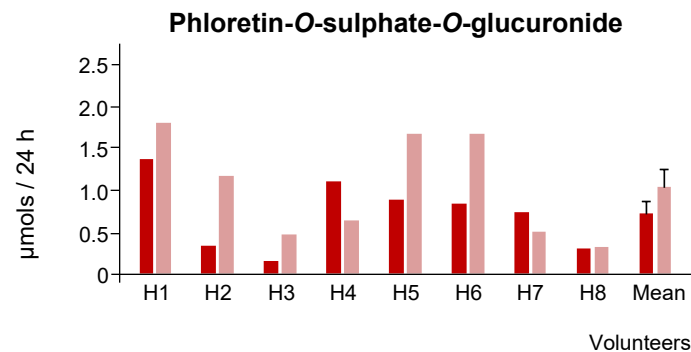

■ First acute Low-PhA snack intake  
 ■ Second acute Low-PhA snack intake

■ First acute High-PhA snack intake  
 ■ Second acute High-PhA snack intake
