# Supplementary material for: Assessment of human inter-individual variability of phloretin metabolites in urine after apple consumption. AppleCOR study
Source: Royal Society of Chemistry journal article supplement (doi:10.1039/d3fo02985a), 2023-01-01
Supplement: d3fo02985a2.pdf [file d3fo02985a2.pdf]

1 **Supplemental figures**

2

3 **Supplemental Figure 1.** Chemical structures of phloretin in apples and the three  
4 generated phloretin phase-II metabolites.

5 (\*)The sulphate and sulphate-glucuronide have not been identified to regio-isomer level  
6 and these are just representative structures.

7

8 **Supplemental Figure 2.** Individual urinary phloretin-O-glucuronide excretion after  
9 sustained intake.

10

11 **Supplemental Figure 3.** Individual urinary phloretin excretion after first and second  
12 acute intakes.

13

14

15

16
