# Supplementary material for: Assessment of human inter-individual variability of phloretin metabolites in urine after apple consumption. AppleCOR study
Source: Royal Society of Chemistry journal article supplement (doi:10.1039/d3fo02985a), 2023-01-01
Supplement: d3fo02985a3.pdf [file d3fo02985a3.pdf]

**Supplemental Table S1.** Selected reaction monitoring (SRM) conditions used for the quantification of phloretin derivatives and its generated metabolites.

| Phloretin derivatives               | SRM Quantification |                  |                       |
|-------------------------------------|--------------------|------------------|-----------------------|
|                                     | Transition         | Cone Voltage (V) | Collision energy (eV) |
| Phloretin-2'-O-glucoside            | 435 > 273          | 40               | 15                    |
| Phloretin-O-xylosylglucoside        | 567 > 273          | 45               | 15                    |
| Hydroxyphloretin-O-xylosylglucoside | 583 > 289          | 45               | 15                    |
| Phloretin-O-glucuronide             | 449 > 273          | 40               | 20                    |
| Phloretin-O-sulphate                | 353 > 273          | 40               | 20                    |
| Phloretin-O-sulphate-O-glucuronide  | 529 > 353          | 40               | 20                    |

**Supplemental Table S2.** Phloretin composition and its concentration (mg and  $\mu\text{mol}$ ) consumed in 80 g of low-PhA snack and 80 g of high-PhA snack by the volunteers. The results are expressed as the mean  $\pm$  standard deviation ( $n=6$ )

| <b>Phloretin derivatives</b>                                 | <b>Low-PhA snack<br/>(mg/80 g snack)</b> | <b>High-PhA snack<br/>(mg/80 g snack)</b> | <b>High-PhA vs<br/>Low-PhA snacks</b> |
|--------------------------------------------------------------|------------------------------------------|-------------------------------------------|---------------------------------------|
| Phloretin-2'-O-glucoside                                     | 8.32 $\pm$ 2.70                          | 21.4 $\pm$ 4.10                           | 2.57                                  |
| Phloretin-O-xylosylglucoside                                 | 10.8 $\pm$ 0.91                          | 29.4 $\pm$ 5.82                           | 2.72                                  |
| Hydroxyphloretin-O-xylosylglucoside                          | 0.80 $\pm$ 0.14                          | 1.24 $\pm$ 0.19                           | 1.55                                  |
| <b><i>TOTAL (mg/80 g)</i></b>                                | <b><i>19.9 <math>\pm</math> 3.76</i></b> | <b><i>52.0 <math>\pm</math> 10.1</i></b>  | <b><i>2.61</i></b>                    |
| <b><i>TOTAL (<math>\mu\text{mol}/80\text{ g}</math>)</i></b> | <b><i>39.5 <math>\pm</math> 8.03</i></b> | <b><i>103 <math>\pm</math> 20.0</i></b>   | <b><i>2.49</i></b>                    |

**Supplemental Table S3.** Dose of macronutrients and other phytochemicals consumed in 80 g of Low-PhA snack and High-PhA snack by the volunteers. The results are expressed as the mean  $\pm$  standard deviation ( $n=6$ )

| <b><i>Macronutrients and other phytochemicals</i></b> | <b>Low-PhA snack</b> | <b>High PhA snack</b> |
|-------------------------------------------------------|----------------------|-----------------------|
| Energy (Kcal)                                         | 221 $\pm$ 1.89       | 188 $\pm$ 7.49        |
| Protein (g)                                           | 2.10 $\pm$ 0.00      | 2.40 $\pm$ 0.00       |
| Lipids (g)                                            | 0.66 $\pm$ 0.01      | 0.69 $\pm$ 0.04       |
| Carbohydrates (g)                                     | 73.9 $\pm$ 0.27      | 74.9 $\pm$ 0.14       |
| Sugars from carbohydrates (g)                         | 51.4 $\pm$ 0.66      | 43.0 $\pm$ 1.85       |
| Total fibre (g)                                       | 11.1 $\pm$ 1.37      | 13.2 $\pm$ 0.02       |
| Organic acids (citric, malic) (g)                     | 2.20 $\pm$ 0.01      | 2.35 $\pm$ 0.02       |
| Triterpenes (mg)                                      | 26.2 $\pm$ 1.27      | 21.8 $\pm$ 3.61       |

**Supplemental Table S4.** Stratification of a) phloretin-O-glucuronide, b) phloretin-O-sulphate, and c) phloretin-O-sulphate-O-glucuronide after the sustained intake of high-PhA Snack. In addition to the sustained intake, the volunteers from H1 to H8 also participated in the two acute studies: days 0 and 42 before and after the sustained intake.

**a) Phloretin-O-glucuronide**

| n° | Volunteer | Producers ( $\mu\text{mol}/24\text{ h}$ ) |                   |                   |                   |
|----|-----------|-------------------------------------------|-------------------|-------------------|-------------------|
|    |           | All                                       | High              | Medium            | Low               |
| 1  | 34 (H1)   | 4.88                                      | 4.88              |                   |                   |
| 2  | 35        | 2.27                                      | 2.27              |                   |                   |
| 3  | 36        | 0.86                                      |                   | 0.86              |                   |
| 4  | 37 (H2)   | 0.84                                      |                   | 0.84              |                   |
| 5  | 38 (H3)   | 2.48                                      | 2.48              |                   |                   |
| 6  | 39 (H4)   | 0.00                                      |                   |                   | 0.00              |
| 7  | 40        | 1.60                                      |                   | 1.60              |                   |
| 8  | 41        | 3.22                                      | 3.22              |                   |                   |
| 9  | 42 (H5)   | 3.28                                      | 3.28              |                   |                   |
| 10 | 43        | 0.00                                      |                   |                   | 0.00              |
| 11 | 44        | 1.24                                      |                   | 1.24              |                   |
| 12 | 45        | 0.00                                      |                   |                   | 0.00              |
| 13 | 46        | 0.76                                      |                   | 0.76              |                   |
| 14 | 47        | 2.47                                      | 2.47              |                   |                   |
| 15 | 48        | 0.00                                      |                   |                   | 0.00              |
| 16 | 49 (H6)   | 0.83                                      |                   | 0.83              |                   |
| 17 | 50        | 0.00                                      |                   |                   | 0.00              |
| 18 | 51        | 2.15                                      |                   | 2.15              |                   |
| 19 | 52        | 1.52                                      |                   | 1.52              |                   |
| 20 | 53        | 2.76                                      | 2.76              |                   |                   |
| 21 | 54 (H7)   | 2.90                                      | 2.90              |                   |                   |
| 22 | 55        | 0.70                                      |                   |                   | 0.70              |
| 23 | 56        | 1.86                                      |                   | 1.86              |                   |
| 24 | 57 (H8)   | 2.98                                      | 2.98              |                   |                   |
| 25 | 58        | 0.58                                      |                   |                   | 0.58              |
| 26 | 59        | 2.16                                      |                   | 2.16              |                   |
| 27 | 60        | 1.35                                      |                   | 1.35              |                   |
| 28 | 61        | 0.00                                      |                   |                   | 0.00              |
| 29 | 62        | 0.21                                      |                   |                   | 0.21              |
|    | Mean      | 1.51 <sup>b</sup>                         | 3.03 <sup>c</sup> | 1.38 <sup>b</sup> | 0.17 <sup>a</sup> |
|    | SEM       | 0.24                                      | 0.26              | 0.16              | 0.09              |
|    | <i>n</i>  | 29                                        | 9                 | 11                | 9                 |

**b) Phloretin-O-sulphate**

| n° | Volunteer | Producers (µmol/24 h) |                   |                     |                   |
|----|-----------|-----------------------|-------------------|---------------------|-------------------|
|    |           | All                   | High              | Medium              | Low               |
| 1  | 34 (H1)   | 0.84                  | 0.84              |                     |                   |
| 2  | 35        | 0.53                  | 0.53              |                     |                   |
| 3  | 36        | 0.15                  |                   |                     | 0.15              |
| 4  | 37 (H2)   | 0.17                  |                   | 0.17                |                   |
| 5  | 38 (H3)   | 0.17                  |                   | 0.17                |                   |
| 6  | 39 (H4)   | 0.25                  |                   | 0.25                |                   |
| 7  | 40        | 0.13                  |                   |                     | 0.13              |
| 8  | 41        | 0.24                  |                   | 0.24                |                   |
| 9  | 42 (H5)   | 0.51                  | 0.51              |                     |                   |
| 10 | 43        | 0.28                  |                   | 0.28                |                   |
| 11 | 44        | 0.25                  |                   | 0.25                |                   |
| 12 | 45        | 0.11                  |                   |                     | 0.11              |
| 13 | 46        | 0.43                  | 0.43              |                     |                   |
| 14 | 47        | 0.52                  | 0.52              |                     |                   |
| 15 | 48        | 0.10                  |                   |                     | 0.10              |
| 16 | 49 (H6)   | 0.12                  |                   |                     | 0.12              |
| 17 | 50        | 0.30                  |                   | 0.30                |                   |
| 18 | 51        | 0.39                  | 0.39              |                     |                   |
| 19 | 52        | 0.50                  | 0.50              |                     |                   |
| 20 | 53        | 0.46                  | 0.46              |                     |                   |
| 21 | 54 (H7)   | 0.42                  | 0.42              |                     |                   |
| 22 | 55        | 0.19                  |                   | 0.19                |                   |
| 23 | 56        | 0.21                  |                   | 0.21                |                   |
| 24 | 57 (H8)   | 0.28                  |                   | 0.28                |                   |
| 25 | 58        | 0.09                  |                   |                     | 0.09              |
| 26 | 59        | 0.24                  |                   | 0.24                |                   |
| 27 | 60        | 0.11                  |                   |                     | 0.11              |
| 28 | 61        | 0.18                  |                   | 0.18                |                   |
| 29 | 62        | 0.08                  |                   |                     | 0.08              |
|    | Mean      | 0.28 <sup>b</sup>     | 0.51 <sup>c</sup> | 0.23 <sup>a,b</sup> | 0.11 <sup>a</sup> |
|    | SEM       | 0.03                  | 0.04              | 0.01                | 0.01              |
|    | <i>n</i>  | 29                    | 9                 | 12                  | 8                 |

c) phloretin-*O*-sulphate-*O*-glucuronide

| n° | Volunteer | Producers (µmol/24 h) |                   |                   |                   |
|----|-----------|-----------------------|-------------------|-------------------|-------------------|
|    |           | All                   | High              | Medium            | Low               |
| 1  | 34 (H1)   | 0.38                  | 0.38              |                   |                   |
| 2  | 35        | 0.52                  | 0.52              |                   |                   |
| 3  | 36        | 0.20                  |                   | 0.20              |                   |
| 4  | 37 (H2)   | 0.19                  |                   | 0.19              |                   |
| 5  | 38 (H3)   | 0.15                  |                   | 0.15              |                   |
| 6  | 39 (H4)   | 0.00                  |                   |                   | 0.00              |
| 7  | 40        | 0.01                  |                   |                   | 0.01              |
| 8  | 41        | 0.16                  |                   | 0.16              |                   |
| 9  | 42 (H5)   | 0.36                  | 0.36              |                   |                   |
| 10 | 43        | 0.00                  |                   |                   | 0.00              |
| 11 | 44        | 0.16                  |                   | 0.16              |                   |
| 12 | 45        | 0.05                  |                   |                   | 0.05              |
| 13 | 46        | 0.30                  | 0.30              |                   |                   |
| 14 | 47        | 0.14                  |                   | 0.14              |                   |
| 15 | 48        | 0.00                  |                   |                   | 0.00              |
| 16 | 49 (H6)   | 0.11                  |                   | 0.11              |                   |
| 17 | 50        | 0.00                  |                   |                   | 0.00              |
| 18 | 51        | 0.30                  | 0.30              |                   |                   |
| 19 | 52        | 0.29                  | 0.29              |                   |                   |
| 20 | 53        | 0.14                  |                   | 0.14              |                   |
| 21 | 54 (H7)   | 0.41                  | 0.41              |                   |                   |
| 22 | 55        | 0.00                  |                   |                   | 0.00              |
| 23 | 56        | 0.25                  | 0.25              |                   |                   |
| 24 | 57 (H8)   | 0.25                  | 0.25              |                   |                   |
| 25 | 58        | 0.11                  |                   | 0.11              |                   |
| 26 | 59        | 0.20                  |                   | 0.20              |                   |
| 27 | 60        | 0.23                  |                   | 0.23              |                   |
| 28 | 61        | 0.00                  |                   |                   | 0.00              |
| 29 | 62        | 0.07                  |                   |                   | 0.07              |
|    | Mean      | 0.17 <sup>b</sup>     | 0.34 <sup>c</sup> | 0.16 <sup>b</sup> | 0.01 <sup>a</sup> |
|    | SEM       | 0.03                  | 0.03              | 0.01              | 0.01              |
|    | <i>n</i>  | 29                    | 9                 | 11                | 9                 |

**Supplemental Table S5.** Stratification of a) phloretin-*O*-glucuronide, b) phloretin-*O*-sulphate, and c) phloretin-*O*-sulphate-*O*-glucuronide after the first acute intake of high-PhA Snack.

**a) Phloretin-*O*-glucuronide**

| n° | Volunteer | Producers (µmol/24 h) |                   |                   |
|----|-----------|-----------------------|-------------------|-------------------|
|    |           | All                   | High              | Low               |
| 1  | H1        | 3.34                  |                   | 3.34              |
| 2  | H2        | 2.11                  |                   | 2.11              |
| 3  | H3        | 1.17                  |                   | 1.17              |
| 4  | H4        | 5.86                  | 5.86              |                   |
| 5  | H5        | 3.08                  |                   | 3.08              |
| 6  | H6        | 4.83                  | 4.83              |                   |
| 7  | H7        | 3.47                  | 3.47              |                   |
| 8  | H8        | 3.67                  | 3.67              |                   |
|    | Mean      | 3.44 <sup>a,b</sup>   | 4.46 <sup>b</sup> | 3.44 <sup>a</sup> |
|    | SEM       | 0.52                  | 0.56              | 0.52              |
|    | <i>n</i>  | 8                     | 4                 | 4                 |

**b) Phloretin-*O*-sulphate**

| n° | Volunteer | Producers (µmol/24 h) |                   |                   |
|----|-----------|-----------------------|-------------------|-------------------|
|    |           | All                   | High              | Low               |
| 1  | H1        | 1.17                  | 1.17              |                   |
| 2  | H2        | 0.08                  |                   | 0.08              |
| 3  | H3        | 0.12                  |                   | 0.12              |
| 4  | H4        | 0.74                  | 0.74              |                   |
| 5  | H5        | 1.06                  | 1.06              |                   |
| 6  | H6        | 0.92                  | 0.92              |                   |
| 7  | H7        | 0.69                  |                   | 0.69              |
| 8  | H8        | 0.35                  |                   | 0.35              |
|    | Mean      | 0.64 <sup>a,b</sup>   | 0.97 <sup>b</sup> | 0.31 <sup>a</sup> |
|    | SEM       | 0.15                  | 0.09              | 0.14              |
|    | <i>n</i>  | 8                     | 4                 | 4                 |

**c) Phloretin-*O*-sulphate-*O*-glucuronide**

| n° | Volunteer | Producers (µmol/24 h) |                   |                   |
|----|-----------|-----------------------|-------------------|-------------------|
|    |           | All                   | High              | Low               |
| 1  | H1        | 1.37                  | 1.37              |                   |
| 2  | H2        | 0.33                  |                   | 0.33              |
| 3  | H3        | 0.15                  |                   | 0.15              |
| 4  | H4        | 1.09                  | 1.09              |                   |
| 5  | H5        | 0.89                  | 0.89              |                   |
| 6  | H6        | 0.83                  | 0.83              |                   |
| 7  | H7        | 0.72                  |                   | 0.72              |
| 8  | H8        | 0.30                  |                   | 0.30              |
|    | Mean      | 0.71 <sup>a,b</sup>   | 1.05 <sup>b</sup> | 0.38 <sup>a</sup> |
|    | SEM       | 0.15                  | 0.12              | 0.12              |
|    | <i>n</i>  | 8                     | 4                 | 4                 |

**Supplemental Table S6.** Percent absorption of the native phloretin-O-xylosylglucoside, phloretin-O-glucuronide, phloretin-O-sulphate, and phloretin-O-sulphate-O-glucuronide and its total phase-II conjugates after the sustained intake of low- and high-PhA snack. In addition to the sustained intake, the volunteers from L1 to L7 also participated in the two acute studies: days 0 and 42 before and after the sustained intake of low-PhA snack, and H1 to H8 after the sustained intake of high-PhA snack.

| Volunteer              | Excretion |      |      |      |       | Percent Absorption |      |      |      |       |
|------------------------|-----------|------|------|------|-------|--------------------|------|------|------|-------|
|                        | µmol/24 h |      |      |      |       |                    |      |      |      |       |
|                        | PhXG      | PhG  | PhS  | PhSG | Total | PhXG               | PhG  | PhS  | PhSG | Total |
| <b>Low-PhA snack</b>   |           |      |      |      |       |                    |      |      |      |       |
| <i>Low excretor</i>    |           |      |      |      |       |                    |      |      |      |       |
| 1                      | n.d.      | n.d. | 0.17 | n.d. | 0.17  | 0                  | 0    | 0.43 | 0    | 0.43  |
| 2                      | n.d.      | n.d. | 0.73 | 0.23 | 0.96  | 0                  | 0    | 1.85 | 0.58 | 2.43  |
| 11                     | n.d.      | n.d. | 0.08 | 0.08 | 0.16  | 0                  | 0    | 0.20 | 0.20 | 0.41  |
| 15 (L5)                | n.d.      | n.d. | 0.21 | n.d. | 0.21  | 0                  | 0    | 0.53 | 0    | 0.53  |
| 21                     | n.d.      | 0.21 | 0.21 | 0.21 | 0.63  | 0                  | 0.53 | 0.53 | 0.53 | 1.59  |
| 22                     | n.d.      | n.d. | 0.23 | n.d. | 0.23  | 0                  | 0    | 0.58 | 0    | 0.58  |
| 24                     | n.d.      | n.d. | 0.12 | n.d. | 0.12  | 0                  | 0    | 0.30 | 0    | 0.30  |
| 25                     | n.d.      | 0.18 | 0.07 | n.d. | 0.25  | 0                  | 0.46 | 0.18 | 0    | 0.63  |
| 26                     | n.d.      | n.d. | 0.13 | n.d. | 0.13  | 0                  | 0    | 0.33 | 0    | 0.33  |
| 29                     | n.d.      | 0.05 | 0.12 | 0.01 | 0.18  | 0                  | 0.13 | 0.30 | 0.03 | 0.46  |
| 32                     | n.d.      | n.d. | 0.15 | n.d. | 0.15  | 0                  | 0    | 0.38 | 0    | 0.38  |
| <i>Medium excretor</i> |           |      |      |      |       |                    |      |      |      |       |
| 6                      | n.d.      | 0.54 | 0.36 | n.d. | 0.90  | 0                  | 1.37 | 0.91 | 0    | 2.28  |
| 8                      | n.d.      | 0.86 | 0.27 | 0.22 | 1.35  | 0                  | 2.18 | 0.68 | 0.56 | 3.42  |
| 10 (L4)                | n.d.      | 0.90 | 0.45 | 0.35 | 1.70  | 0                  | 2.28 | 1.14 | 0.89 | 4.30  |
| 13                     | n.d.      | 0.62 | 0.34 | 0.17 | 1.13  | 0                  | 1.57 | 0.86 | 0.43 | 2.86  |
| 16                     | n.d.      | 0.39 | 0.08 | 0.16 | 0.63  | 0                  | 0.99 | 0.20 | 0.41 | 1.59  |
| 23                     | n.d.      | 0.42 | 0.10 | n.d. | 0.52  | 0                  | 1.06 | 0.25 | 0    | 1.32  |
| 27                     | n.d.      | 0.26 | 0.25 | 0.02 | 0.53  | 0                  | 0.66 | 0.63 | 0.05 | 1.34  |
| 28                     | n.d.      | 0.40 | 0.24 | 0.18 | 0.82  | 0                  | 1.01 | 0.61 | 0.46 | 2.08  |
| 30                     | n.d.      | 0.69 | 0.38 | 0.08 | 1.15  | 0                  | 1.75 | 0.96 | 0.20 | 2.91  |
| 31                     | n.d.      | 0.93 | 0.09 | 0.37 | 1.39  | 0                  | 2.35 | 0.23 | 0.94 | 3.52  |
| 33                     | n.d.      | 0.22 | 0.17 | 0.07 | 0.46  | 0                  | 0.56 | 0.43 | 0.18 | 1.16  |
| <i>High excretor</i>   |           |      |      |      |       |                    |      |      |      |       |
| 3                      | n.d.      | 1.24 | 0.13 | 0.17 | 1.54  | 0                  | 3.14 | 0.33 | 0.43 | 3.90  |
| 4 (L1)                 | n.d.      | 0.97 | n.d. | 0.18 | 1.15  | 0                  | 2.46 | 0    | 0.46 | 2.91  |
| 5 (L2)                 | n.d.      | 1.15 | 0.15 | 0.16 | 1.46  | 0                  | 2.91 | 0.38 | 0.41 | 3.70  |
| 7                      | n.d.      | 1.62 | 0.16 | n.d. | 1.78  | 0                  | 4.10 | 0.41 | 0    | 4.51  |
| 9 (L3)                 | n.d.      | 1.28 | 0.26 | 0.19 | 1.73  | 0                  | 3.24 | 0.66 | 0.48 | 4.38  |
| 12                     | n.d.      | 2.24 | 0.25 | 0.25 | 2.74  | 0                  | 5.67 | 0.63 | 0.63 | 6.94  |
| 14                     | n.d.      | 0.95 | n.d. | n.d. | 0.95  | 0                  | 2.41 | 0    | 0    | 2.41  |
| 17 (L6)                | n.d.      | 1.26 | 0.16 | n.d. | 1.42  | 0                  | 3.19 | 0.41 | 0    | 3.59  |
| 18                     | n.d.      | 1.45 | 0.24 | 0.19 | 1.88  | 0                  | 3.67 | 0.61 | 0.48 | 4.76  |
| 19                     | n.d.      | 1.08 | n.d. | 0.14 | 1.22  | 0                  | 2.73 | 0    | 0.35 | 3.09  |
| 20 (L7)                | n.d.      | 1.62 | 0.10 | 0.13 | 1.85  | 0                  | 4.10 | 0.25 | 0.33 | 4.68  |
| <b>High-PhA snack</b>  |           |      |      |      |       |                    |      |      |      |       |
| <i>Low excretor</i>    |           |      |      |      |       |                    |      |      |      |       |
| 39 (H4)                | n.d.      | n.d. | 0.25 | n.d. | 0.25  | 0                  | 0    | 0.24 | 0    | 0.24  |
| 43                     | n.d.      | n.d. | 0.28 | n.d. | 0.28  | 0                  | 0    | 0.27 | 0    | 0.27  |
| 45                     | n.d.      | n.d. | 0.11 | 0.05 | 0.16  | 0                  | 0    | 0.11 | 0.05 | 0.16  |
| 48                     | n.d.      | n.d. | 0.10 | n.d. | 0.10  | 0                  | 0    | 0.10 | 0    | 0.10  |
| 50                     | n.d.      | n.d. | 0.30 | n.d. | 0.30  | 0                  | 0    | 0.29 | 0    | 0.29  |
| 55                     | n.d.      | 0.70 | 0.19 | n.d. | 0.89  | 0                  | 0.68 | 0.18 | 0    | 0.86  |
| 58                     | n.d.      | 0.58 | 0.09 | 0.11 | 0.78  | 0                  | 0.56 | 0.09 | 0.11 | 0.76  |
| 61                     | n.d.      | n.d. | 0.18 | n.d. | 0.18  | 0                  | 0    | 0.17 | 0    | 0.17  |
| 62                     | n.d.      | 0.21 | 0.08 | 0.07 | 0.36  | 0                  | 0.20 | 0.08 | 0.07 | 0.35  |
| <i>Medium excretor</i> |           |      |      |      |       |                    |      |      |      |       |
| 36                     | 0         | 0.86 | 0.15 | 0.20 | 1.21  | 0.00               | 0.83 | 0.15 | 0.19 | 1.17  |
| 37 (H2)                | n.d.      | 0.84 | 0.17 | 0.19 | 1.20  | 0                  | 0.82 | 0.17 | 0.18 | 1.17  |
| 40                     | n.d.      | 1.60 | 0.13 | 0.01 | 1.74  | 0                  | 1.55 | 0.13 | 0.01 | 1.69  |
| 44                     | n.d.      | 1.24 | 0.25 | 0.16 | 1.65  | 0                  | 1.20 | 0.24 | 0.16 | 1.60  |
| 46                     | 0.01      | 0.76 | 0.43 | 0.30 | 1.50  | 0.01               | 0.74 | 0.42 | 0.29 | 1.46  |
| 49 (H6)                | n.d.      | 0.83 | 0.12 | 0.11 | 1.06  | 0                  | 0.81 | 0.12 | 0.11 | 1.03  |
| 51                     | 0.01      | 2.15 | 0.39 | 0.30 | 2.85  | 0.01               | 2.09 | 0.38 | 0.29 | 2.77  |
| 52                     | 0.01      | 1.52 | 0.50 | 0.29 | 2.32  | 0.01               | 1.48 | 0.49 | 0.28 | 2.25  |



|                      |       |      |      |      |      |      |      |      |      |      |
|----------------------|-------|------|------|------|------|------|------|------|------|------|
| 56                   | 0.02  | 1.86 | 0.21 | 0.25 | 2.34 | 0.02 | 1.81 | 0.20 | 0.24 | 2.27 |
| 59                   | 0.02  | 2.16 | 0.24 | 0.20 | 2.62 | 0.02 | 2.10 | 0.23 | 0.19 | 2.54 |
| 60                   | n.d.  | 1.35 | 0.11 | 0.23 | 1.69 | 0    | 1.31 | 0.11 | 0.22 | 1.64 |
| <i>High excretor</i> |       |      |      |      |      |      |      |      |      |      |
| 34 (H1)              | 0.02  | 4.88 | 0.84 | 0.38 | 6.12 | 0.02 | 4.74 | 0.82 | 0.37 | 5.94 |
| 35                   | 0.01  | 2.27 | 0.53 | 0.52 | 3.33 | 0.01 | 2.20 | 0.51 | 0.50 | 3.23 |
| 38 (H3)              | n.d.  | 2.48 | 0.17 | 0.15 | 2.80 | 0    | 2.41 | 0.17 | 0.15 | 2.72 |
| 41                   | n.d.  | 3.22 | 0.24 | 0.16 | 3.62 | 0    | 3.13 | 0.23 | 0.16 | 3.51 |
| 42 (H5)              | n.d.  | 3.28 | 0.51 | 0.36 | 4.15 | 0    | 3.18 | 0.50 | 0.35 | 4.03 |
| 47                   | n.d.  | 2.47 | 0.52 | 0.14 | 3.13 | 0    | 2.40 | 0.50 | 0.14 | 3.04 |
| 53                   | n.d.  | 2.76 | 0.46 | 0.14 | 3.36 | 0    | 2.68 | 0.45 | 0.14 | 3.26 |
| 54 (H7)              | 0.004 | 2.90 | 0.42 | 0.41 | 3.73 | 0.00 | 2.82 | 0.41 | 0.40 | 3.63 |
| 57 (H8)              | 0.02  | 2.98 | 0.28 | 0.25 | 3.53 | 0.02 | 2.89 | 0.27 | 0.24 | 3.43 |

---
